# Supplementary material
Source: PubMed Central journal article supplement (PMC3807679)
Supplement: NIHMS507904-supplement-supplement_1.pdf [file NIHMS507904-supplement-supplement_1.pdf]

**Supp. Table 1. Viral population dynamics of superinfected participants.**

| <b>Subject</b> | <b>Coding<br/>Regions</b> | <b>Initial Strain</b> | <b>Superinfecting Strain</b> | <b>Recombination</b> |
|----------------|---------------------------|-----------------------|------------------------------|----------------------|
| K6             | RT                        | Replaced              | Persists                     | No                   |
|                | C2V3                      | Replaced              | Persists                     | No                   |
| K9             | RT                        | Replaced              | Persists                     | No                   |
|                | C2V3                      | Replaced              | Persists                     | No                   |
| D2             | RT                        | Persists              | Persists                     | <b>Yes</b>           |
|                | C2V3                      | Persists              | Transient                    | No                   |
| P2             | RT                        | Persists              | Not Detected                 | No                   |
|                | C2V3                      | Persists              | Persists                     | <b>Yes</b>           |
| P8             | RT                        | Persists              | Transient                    | No                   |
|                | C2V3                      | Persists              | Transient                    | No                   |
| S1             | RT                        | Persists              | Transient                    | <b>Yes</b>           |
|                | C2V3                      | Replaced              | Transient                    | No                   |
| U7             | RT                        | Persists              | Persists                     | No                   |
|                | C2V3                      | Persists              | Transient                    | No                   |

Legend: Viral population dynamics are shown for each superinfected participant over the length of follow-up.

**Supp. Table 2. Population HLA Frequency Comparisons.**

| <u>SI vs. MI</u> |        |        |      |      |
|------------------|--------|--------|------|------|
| HLA              | SI (%) | MI (%) | p    | q    |
| A29*             | 14     | 0      | 0.07 | 0.94 |
| C16*             | 14     | 0      | 0.07 | 0.94 |
| DR11             | 0      | 22     | 0.09 | 0.72 |
| B35              | 36     | 14     | 0.11 | 0.60 |
| DR07             | 36     | 17     | 0.25 | 0.93 |

| <u>CI vs. MI</u> |        |        |      |      |
|------------------|--------|--------|------|------|
| HLA              | CI (%) | MI (%) | p    | q    |
| A29              | 25     | 0      | 0.03 | 0.20 |
| C02              | 25     | 0      | 0.03 | 0.20 |
| C16              | 25     | 0      | 0.03 | 0.20 |

| <u>DI vs. MI</u> |        |        |      |      |
|------------------|--------|--------|------|------|
| HLA              | DI (%) | MI (%) | p    | q    |
| A29              | 18     | 0      | 0.03 | 0.20 |
| C02              | 18     | 0      | 0.03 | 0.20 |
| DR11             | 0      | 22     | 0.02 | 0.09 |

Legend: Frequency calculated based on two alleles per haplotype. SI: superinfected group, MI: monoinfected group, CI: co-infected group, DI: dual-infected, p: p-value, q: q-value (false discovery). \*A29 and C16 were found to be in linkage disequilibrium ( $p < 0.05$ ).
